# Supplementary material for: Targeted therapy in patients with PIK3CA-related overgrowth syndrome
Source: Springer Nature journal article supplement (doi:10.1038/s41586-018-0217-9), 2018-06-01
Supplement: 41586_2018_217_MOESM1_ESM.pdf [file 41586_2018_217_MOESM1_ESM.pdf]

In the format provided by the authors and unedited.

# Targeted therapy in patients with PIK3CA-related overgrowth syndrome

Quitterie Venot<sup>1</sup>, Thomas Blanc<sup>1,2,3,21</sup>, Smail Hadj Rabia<sup>2,4,5,21</sup>, Laureline Berteloot<sup>5,6</sup>, Sophia Ladraa<sup>1</sup>, Jean-Paul Duong<sup>2,7</sup>, Estelle Blanc<sup>8</sup>, Simon C. Johnson<sup>9</sup>, Clément Huguin<sup>1</sup>, Olivia Boccara<sup>4</sup>, Sabine Sarnacki<sup>2,3</sup>, Nathalie Boddaert<sup>2,5,6</sup>, Stephanie Pannier<sup>2,10</sup>, Frank Martinez<sup>11</sup>, Sato Magassa<sup>1</sup>, Junna Yamaguchi<sup>1</sup>, Bertrand Knebelmann<sup>1,2,11</sup>, Pierre Merville<sup>12,13</sup>, Nicolas Grenier<sup>14</sup>, Dominique Joly<sup>1,2,11</sup>, Valérie Cormier-Daire<sup>2,5,15</sup>, Caroline Michot<sup>2,5,15</sup>, Christine Bole-Feysot<sup>5</sup>, Arnaud Picard<sup>2,16</sup>, Véronique Soupre<sup>16</sup>, Stanislas Lyonnet<sup>2,5,15</sup>, Jeremy Sadoine<sup>17</sup>, Lotfi Slimani<sup>17</sup>, Catherine Chaussain<sup>2,17</sup>, Cécile Laroche-Raynaud<sup>18</sup>, Laurent Guibaud<sup>19</sup>, Christine Broissand<sup>20</sup>, Jeanne Amiel<sup>2,5,15</sup>, Christophe Legendre<sup>1,2,11</sup>, Fabiola Terzi<sup>1,2</sup> & Guillaume Canaud<sup>1,2,11\*</sup>

<sup>1</sup>INSERM U1151, Institut Necker Enfants Malades, Paris, France. <sup>2</sup>Université Paris Descartes, Sorbonne Paris Cité, Paris, France. <sup>3</sup>Service de Chirurgie Viscérale Pédiatrique, Hôpital Necker-Enfants Malades, AP-HP, Paris, France. <sup>4</sup>Service de Dermatologie Pédiatrique, Hôpital Necker-Enfants Malades, AP-HP, Paris, France. <sup>5</sup>UMR-1163 Institut Imagine, Hôpital Necker-Enfants Malades, AP-HP, Paris, France. <sup>6</sup>Département de Radiologie Pédiatrique, Hôpital Necker-Enfants Malades, AP-HP, Paris, France. <sup>7</sup>Département d'Anatomopathologie, Hôpital Necker-Enfants Malades, AP-HP, Paris, France. <sup>8</sup>Département de Médecine Nucléaire, Hôpital Marie Lannelongue, Le Plessis Robinson, France. <sup>9</sup>Department of Integrative Brain Research, Seattle Children's Research Institute, Seattle, WA, USA. <sup>10</sup>Service d'Orthopédie Pédiatrique, Hôpital Necker-Enfants Malades, AP-HP, Paris, France. <sup>11</sup>Service de Néphrologie Transplantation Adultes, Hôpital Necker-Enfants Malades, AP-HP, Paris, France. <sup>12</sup>Service de Néphrologie, Transplantation, Dialyse, Aphéreses, Centre Hospitalier Universitaire Pellegrin, Bordeaux, France. <sup>13</sup>UMR CNRS 5164, Immuno ConcEpT, CNRS, Bordeaux, France. <sup>14</sup>Service d'Imagerie Diagnostique et Interventionnelle de l'Adulte, Centre Hospitalier Universitaire Pellegrin, Bordeaux, France. <sup>15</sup>Service de Génétique Médicale, Hôpital Necker-Enfants Malades, AP-HP, Paris, France. <sup>16</sup>Service de Chirurgie Maxillo-faciale et Chirurgie Plastique, Hôpital Necker-Enfants Malades, AP-HP, Paris, France. <sup>17</sup>Laboratory EA 2496 Orofacial Pathologies, Imaging and Biotherapies, Montrouge, France. <sup>18</sup>Service de Neuropédiatrie, Hôpital de la Mère et de l'Enfant, Limoges, France. <sup>19</sup>Service d'Imagerie Pédiatrique, Hôpital Femme-Mère-Enfant, Bron, France. <sup>20</sup>Pharmacie, Hôpital Necker-Enfants Malades, AP-HP, Paris, France. <sup>21</sup>These authors contributed equally: Thomas Blanc, Smail Hadj Rabia. \*e-mail: guillaume.canaud@inserm.fr

**Supplementary Table 1:** Demographic characteristics. In this Supplementary Table, we provide the principal demographic characteristics of the patients, the clinical manifestation and the *PIK3CA* mutation.

| Patient | Sex | Age (yrs) | Ethnicity     | Clinical manifestation and reason of BYL719 introduction                                                                                                                 | <i>PIK3CA</i> mutation |              | Tissue | Mosaicism | BYL719 Dosage (mg/d) |
|---------|-----|-----------|---------------|--------------------------------------------------------------------------------------------------------------------------------------------------------------------------|------------------------|--------------|--------|-----------|----------------------|
|         |     |           |               |                                                                                                                                                                          | cDNA change            | AA change    |        |           |                      |
| 1       | F   | 4         | Caucasian     | -Upper right limb overgrowth with intrathoracic tumor<br>-Extreme tiredness<br>-Sleep disturbance<br>-Life threatening complication<br>-Dyspnea NYHA III                 | c.1633G>A              | p.Glu545Lys  | Skin   | 3.0%      | 50                   |
| 2       | F   | 4         | Caucasian     | -Left lower limb overgrowth<br>-Amputation envisaged                                                                                                                     | c.3140A>G              | p.His1047Arg | Skin   | 25.8%     | 50                   |
| 3       | F   | 5         | Caucasian     | -CLOVES<br>-Chronic gastrointestinal bleeding                                                                                                                            | c.1638G>C              | p.Gln546His  | Skin   | 6.0%      | 50                   |
| 4       | F   | 5         | Caucasian     | -Left hemifacial hyperplasia<br>-Growing of the lesion despite multiple surgery                                                                                          | c.3140A>G              | p.His1047Arg | Lipoma | 23.0%     | 50                   |
| 5       | M   | 7         | Caucasian     | -CLOVES                                                                                                                                                                  | c.1258T>C              | p.Cys420Arg  | Skin   | 10.4%     | 50                   |
| 6       | F   | 10        | Caucasian     | -CLOVES<br>-Scoliosis surgery scheduled                                                                                                                                  | c.1624G>A              | p.Glu542Lys  | Skin   | 50.0%     | 50                   |
| 7       | M   | 11        | North African | -CLOVES<br>-Chronic gastrointestinal bleeding<br>-Heparin treatment<br>-Dyspnea NYHA III                                                                                 | c.1258T>C              | p.Cys420Arg  | Skin   | 33.0%     | 50                   |
| 8       | F   | 11        | Caucasian     | -CLOVES<br>-Dyspnea NYHA III                                                                                                                                             | c.3127A>G              | p.Met1043Val | Skin   | 12.4%     | 50                   |
| 9       | F   | 13        | North African | -CLOVES<br>-Left leg amputation<br>-Vascular tumor infiltrating the right kidney<br>-Voluminous splenomegaly<br>-Chronic gastrointestinal bleeding<br>-Heparin treatment | c.3140A>G              | p.His1047Leu | Skin   | 33.0%     | 50                   |

|           |   |    |               |                                                                                                                                                                                                        |            |              |        |       |     |
|-----------|---|----|---------------|--------------------------------------------------------------------------------------------------------------------------------------------------------------------------------------------------------|------------|--------------|--------|-------|-----|
|           |   |    |               | -Dyspnea NYHA III                                                                                                                                                                                      |            |              |        |       |     |
| <b>10</b> | M | 14 | African       | -Bilateral overgrowth of lower limbs<br>-Dyspnea NYHA II<br>-Asthenia                                                                                                                                  | c.3132T>G  | p.Asn1044Lys | Skin   | 6.6%  | 50  |
| <b>11</b> | M | 14 | Caucasian     | -Overgrowth of the right buttock<br>-Intraabdominal vascular tumor infiltrating the left kidney and spinal nerve<br>-Chronic hematuria<br>-Pain with opioid dependency<br>-Permanently confined to bed | c.1624G>A, | p.Glu542Lys  | Skin   | 7.46% | 50  |
| <b>12</b> | M | 15 | Caribbean     | -Multiple large tumors of the trunk and the back<br>-Surgery envisaged                                                                                                                                 | c.3140A>G  | p.His1047Leu | Lipoma | 17.4% | 50  |
| <b>13</b> | M | 16 | Caucasian     | -MCAP<br>-Left hemifacial hyperplasia                                                                                                                                                                  | c.1624G>A  | p.Glu542Lys  | Tongue | 16.0% | 50  |
| <b>14</b> | F | 16 | Caucasian     | -MCAP<br>-Noninfectious palpebral cellulitis steroid dependent                                                                                                                                         | c.2176G>A  | p.Glu726Lys  | Skin   | 38.0% | 50  |
| <b>15</b> | M | 19 | North African | -Left foot overgrowth<br>-Unstable and painful walking<br>-Amputation envisaged                                                                                                                        | c.3140A>G  | p.His1047Arg | Skin   | 14.0% | 250 |
| <b>16</b> | M | 32 | Caucasian     | -Lower right limb overgrowth<br>- Unstable and painful walking<br>-Amputation envisaged                                                                                                                | c.3140A>G  | p.His1047Arg | Skin   | 19.0% | 250 |
| <b>17</b> | F | 50 | Caucasian     | -Generalized hypertrophy<br>-Severe and diffuse pain with opioid dependency<br>-Permanently confined to bed<br>-Dyspnea, NYHA III<br>-Overweight                                                       | c.1133G>A  | p.Cys378Tyr  | Skin   | 5.0%  | 250 |

CLOVES: Congenital Lipomatous Overgrowth, Vascular malformations, and Epidermal nevi syndrome. MCAP: Megalencephaly-capillary malformation syndrome. F: female. M: Male. NYHA: New York Heart Association.

**Supplementary Table 2:** Response to treatment. In this Supplementary Table, we provide the clinical and radiological responses per patient at 3- and 6-months post BYL719 introduction.

| Patient | Target lesion                      |                      |          |                     |                         |          | Other clinical manifestations                                                                                                                          |
|---------|------------------------------------|----------------------|----------|---------------------|-------------------------|----------|--------------------------------------------------------------------------------------------------------------------------------------------------------|
|         | Clinic<br>(measured circumference) | Clinic (% of change) |          | Radiology           | Radiology (% of change) |          |                                                                                                                                                        |
|         |                                    | 3 months             | 6 months |                     | 3 months                | 6 months |                                                                                                                                                        |
| 1       | Right arm                          | -15.4                | -19.2    | Intrathoracic tumor | -42.1                   | -63.9    | -Improvement of tiredness<br>-Improvement of sleep<br>-No more dyspnea                                                                                 |
| 2       | Buttock                            | -10                  | -16.7    | Left buttock        | -28                     | -49      | -Improvement of tiredness                                                                                                                              |
| 3       | Left thigh                         | -12.8                | -15.2    | Left thigh          | -22.2                   | -32.8    | -Improvement of tiredness<br>-No more bleeding                                                                                                         |
| 4       | -                                  | -                    | -        | Tumor face volume   | -35.8                   | -41.3    |                                                                                                                                                        |
| 5       | Left thigh                         | -9.6                 | -11.6    | Subcutaneous lipoma | -17.3                   | -34.8    | -Improvement of tiredness                                                                                                                              |
| 6       | Tumor of the back                  | -12.8                | -15.2    | Tumor of the back   | -22.2                   | -32.7    | -Improvement of tiredness<br>-Surgical corset removed                                                                                                  |
| 7       | Left thigh                         | -17.2                | -25.1    | Left thigh          | -11.1                   | -18.1    | -Improvement of tiredness<br>-No more bleeding<br>-Heparin treatment stopped, no more DIC<br>-No more dyspnea                                          |
| 8       | Chest girth                        | -11.1                | -13.3    | Subcutaneous lipoma | -11.8                   | -18.7    | -Improvement of tiredness                                                                                                                              |
| 9       | Right thigh                        | -15.9                | -18.2    | Right kidney tumor  | -67.5                   | -73.1    | -Improvement of tiredness<br>-No more bleeding<br>-Heparin treatment stopped, no more DIC<br>-No more dyspnea<br>-Volume reduction of the splenomegaly |
| 10      | Buttock                            | -13.2                | -14.9    | Right buttock       | -20.3                   | -40.6    | -Improvement of tiredness<br>-No more dyspnea                                                                                                          |
| 11      | Buttock                            | -7.6                 | -14.2    | Left kidney tumor   | -52.5                   | -68.8    | -Improvement of tiredness<br>-No more hematuria<br>-No more pain, opioids stopped after 2 months<br>-Capable to walk                                   |

|           |                     |       |        |                     |       |       |                                                                                                                                                |
|-----------|---------------------|-------|--------|---------------------|-------|-------|------------------------------------------------------------------------------------------------------------------------------------------------|
|           |                     |       |        |                     |       |       | -Went back to school                                                                                                                           |
| <b>12</b> | Back tumor          | -11.4 | -14.8  | Back tumor          | -30.2 | -37.2 | -Improvement of tiredness                                                                                                                      |
| <b>13</b> | -                   | -     | N/A    | Tumor face volume   | -22.1 | -31.3 | -Improvement of tiredness<br>-Enhancement of the cognitive function and behavior                                                               |
| <b>14</b> | Waist circumference | -13.4 | -16.6% | Waist circumference | -18.1 | -22.1 | -Improvement of tiredness<br>-Enhancement of the cognitive function and behavior<br>-Healing of the cellulitis, steroids stopped without flare |
| <b>15</b> | Left foot           | -11.9 | -14.8  | Left foot           | -17.2 | -27.9 | -Improvement of tiredness<br>-Improvement of the walking distance                                                                              |
| <b>16</b> | Right foot          | -8.6  | -13.8  | Right foot          | -30.2 | -37.2 | -Improvement of tiredness<br>-Improvement of the walking distance                                                                              |
| <b>17</b> | Waist circumference | -21.4 | -24.5  | Waist circumference | -17.6 | -24.9 | -Improvement of tiredness<br>-No more dyspnea<br>-No more pain, opioids stopped in 2 weeks<br>-Capable to walk<br>-Dramatic weight loss        |

DIC: Disseminated intravascular coagulation. -: Not appropriate for measurement.
