# Supplementary material for: Targeted therapy in patients with PIK3CA-related overgrowth syndrome
Source: Springer Nature journal article supplement (doi:10.1038/s41586-018-0217-9), 2018-06-01
Supplement: 41586_2018_217_MOESM3_ESM.pdf [file 41586_2018_217_MOESM3_ESM.pdf]

Liver

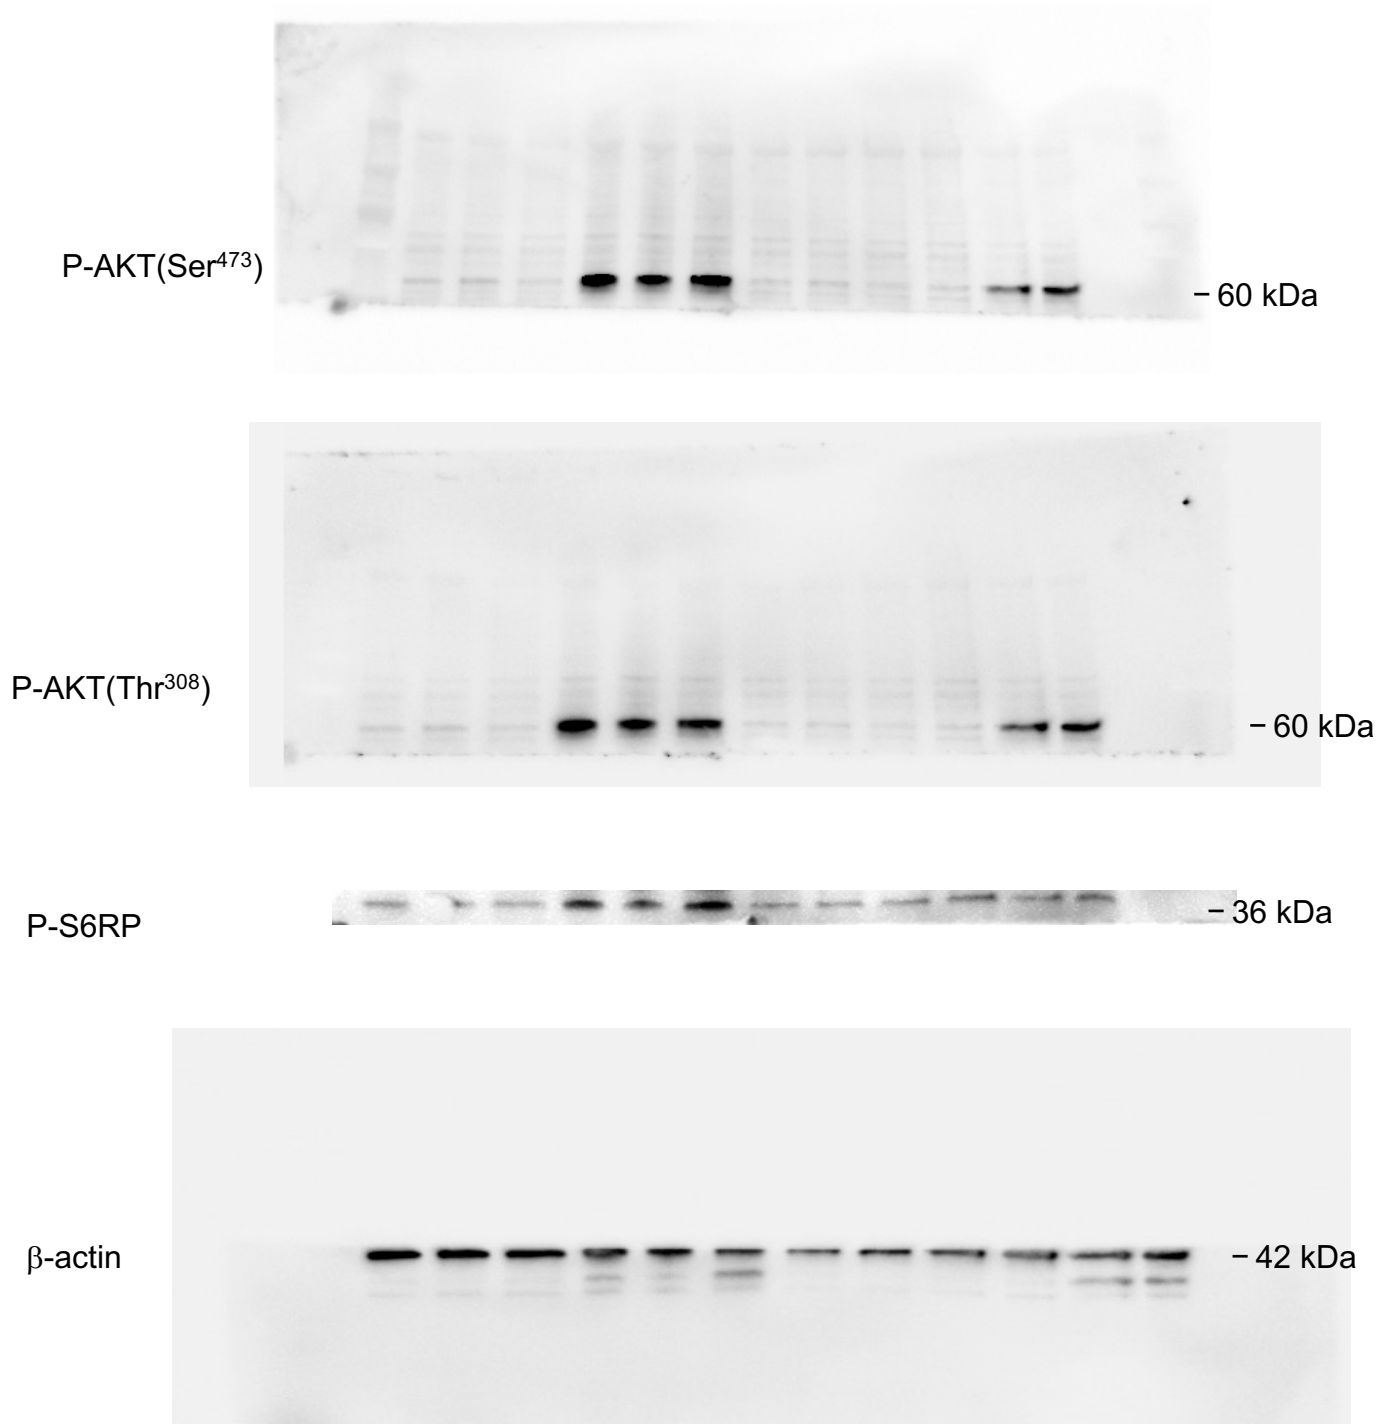

Figure 1

# Heart

P-AKT(Ser<sup>473</sup>)

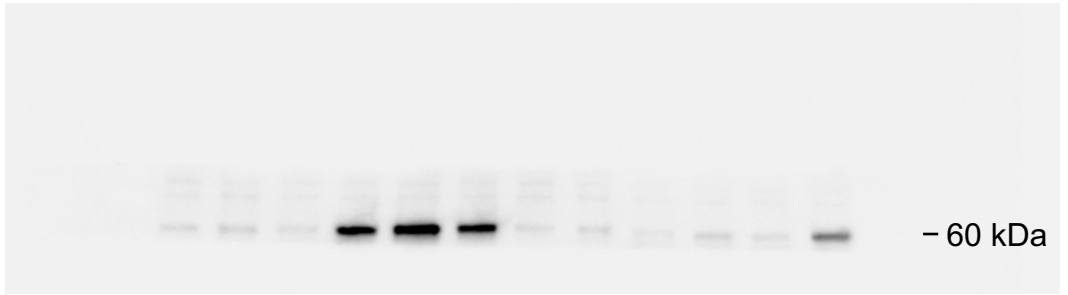

- 60 kDa

P-AKT(Thr<sup>308</sup>)

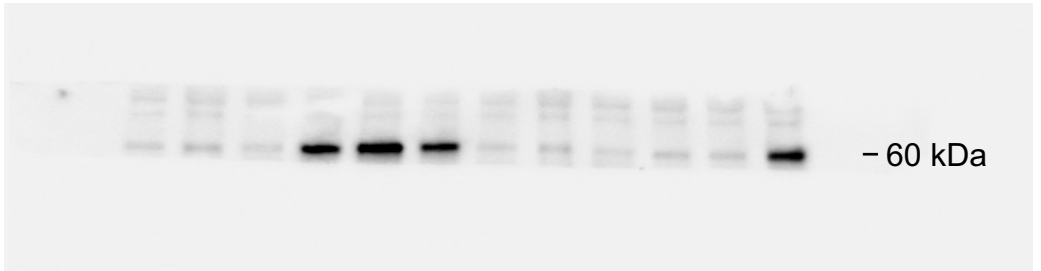

- 60 kDa

P-S6RP

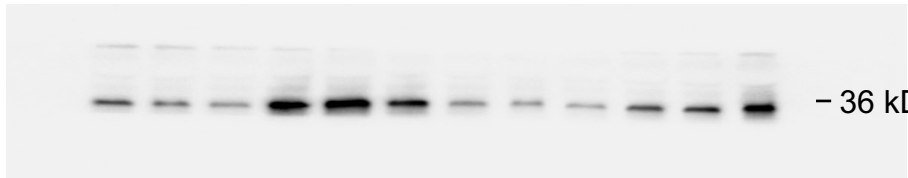

- 36 kDa

$\beta$ -actin

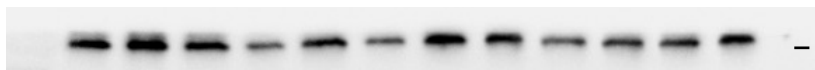

- 42 kDa

Figure 1

# Muscle

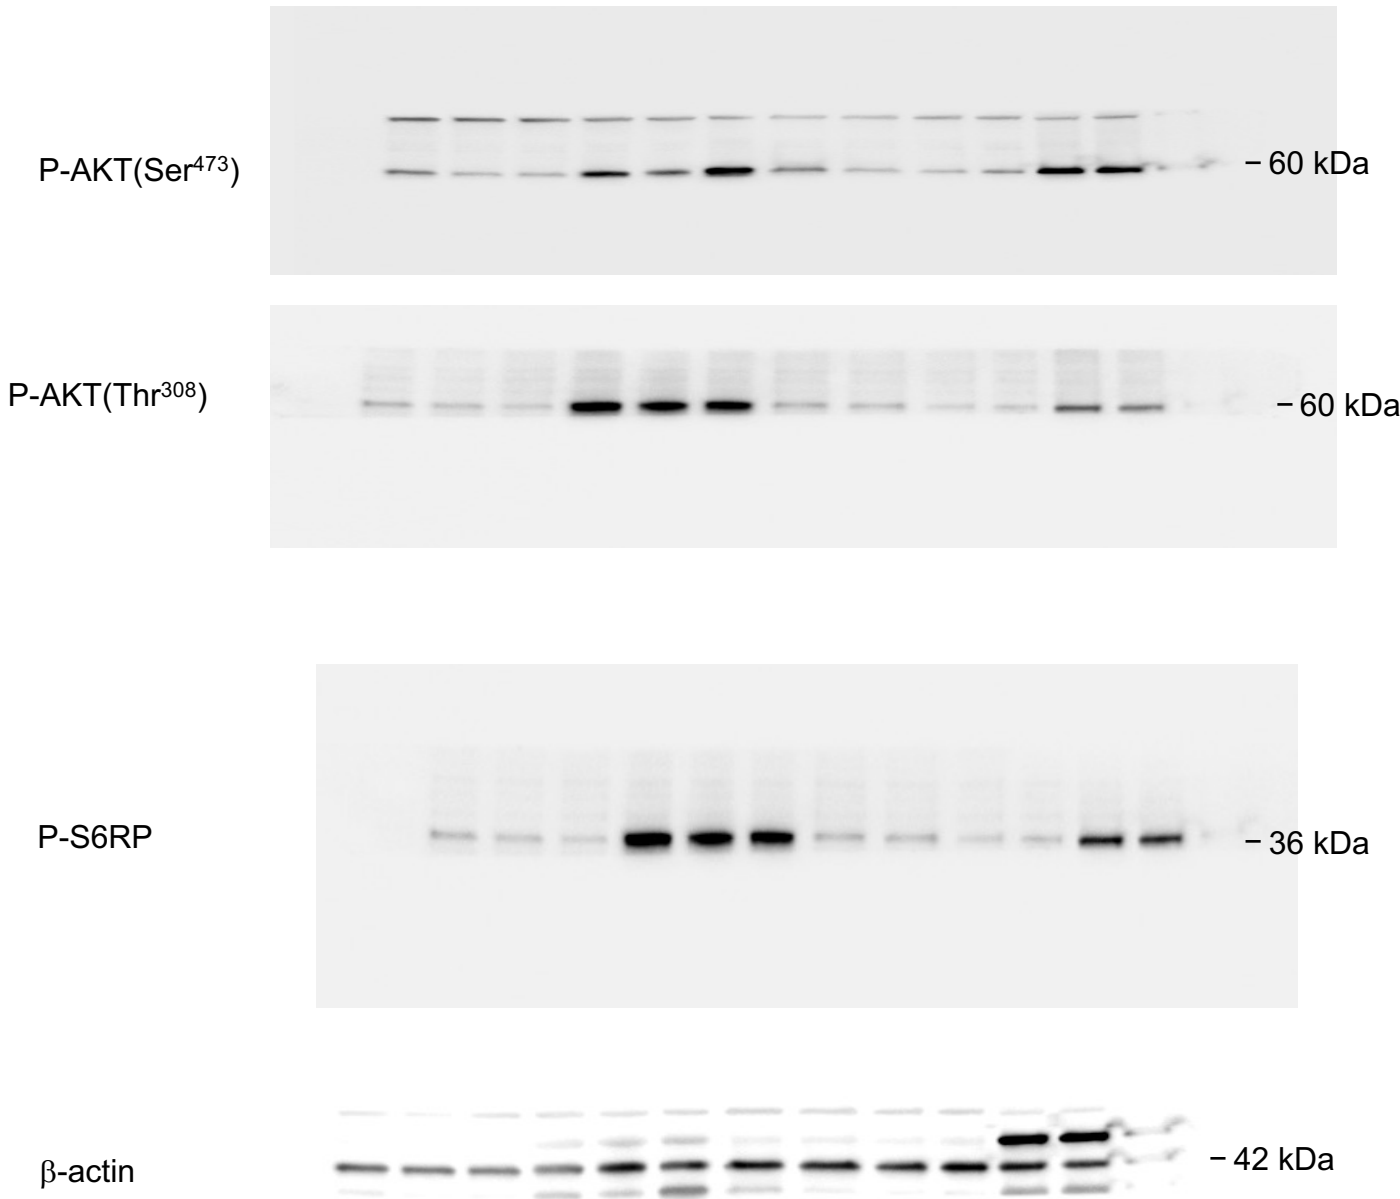

Figure 1

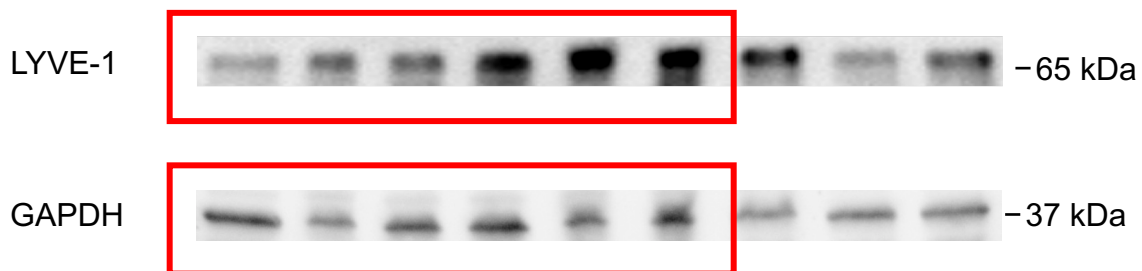

### Muscle

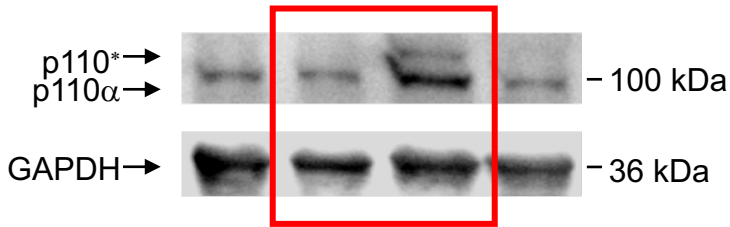

### Liver

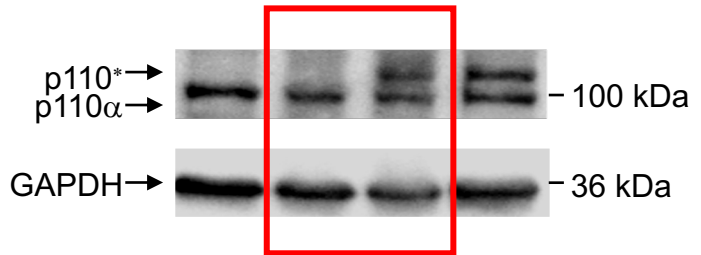

### Kidney

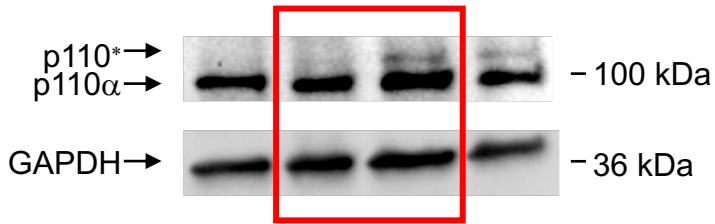

### Heart

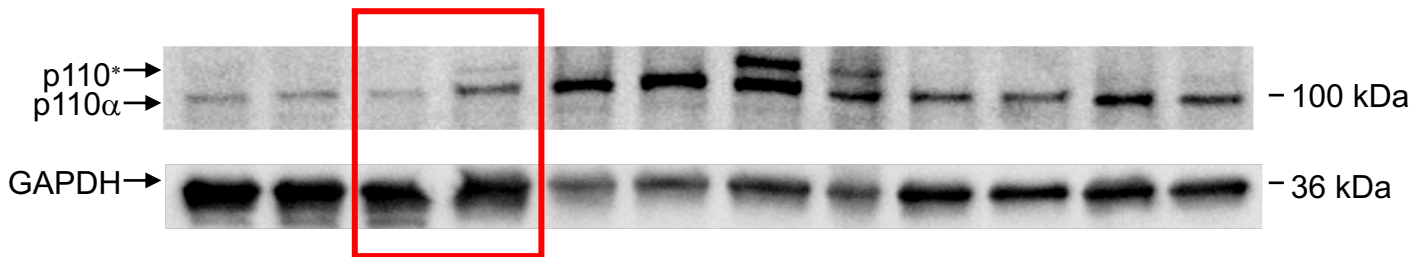

### Brain

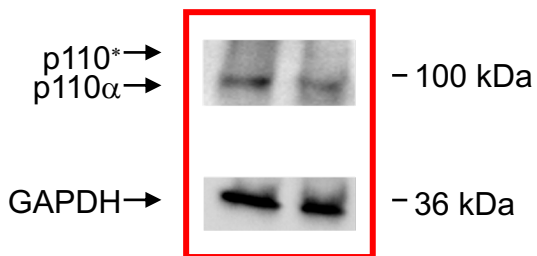

### Lungs

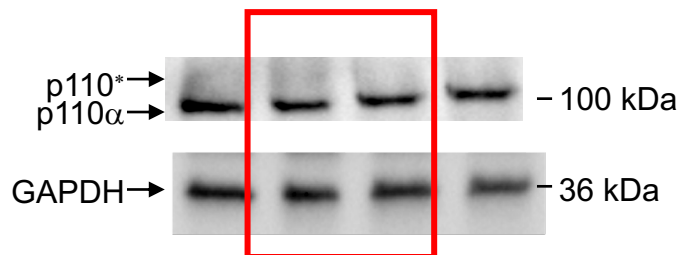

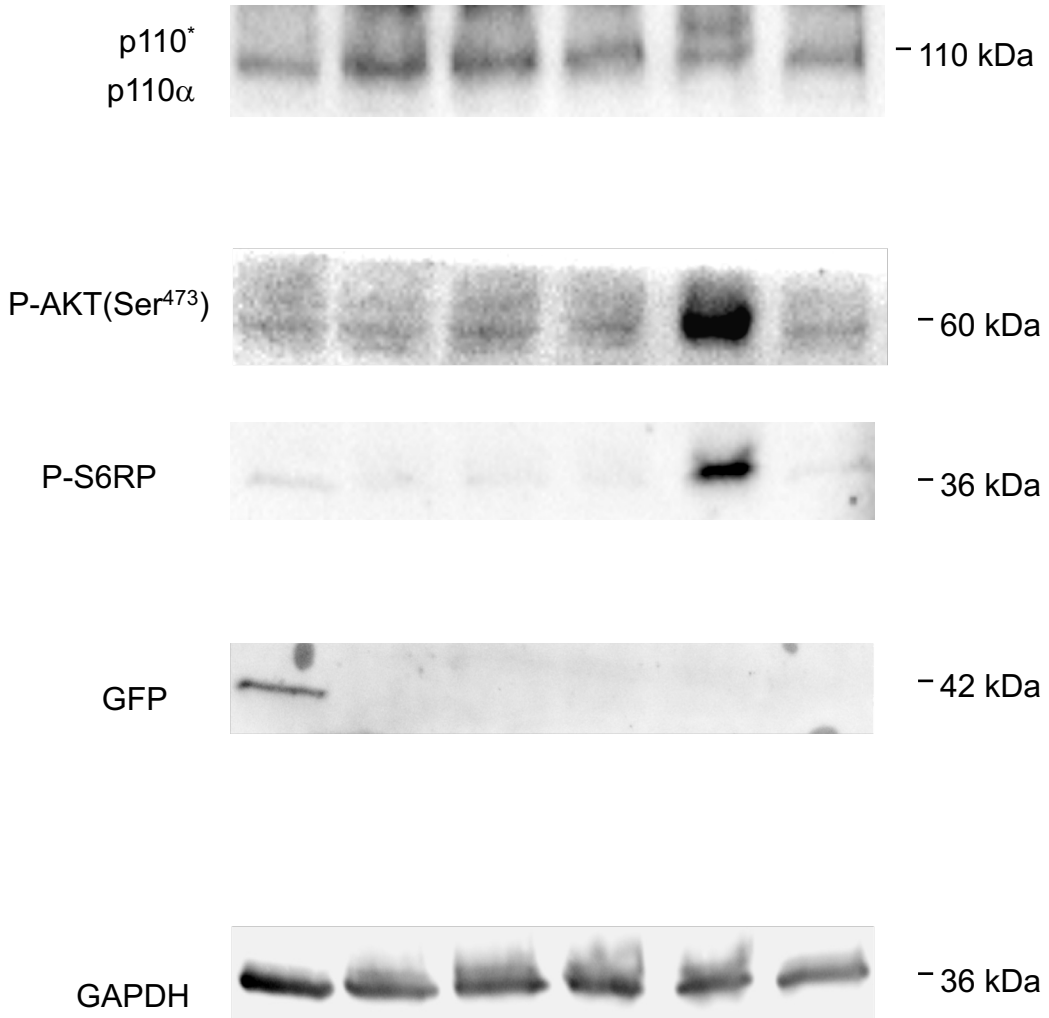

### Liver

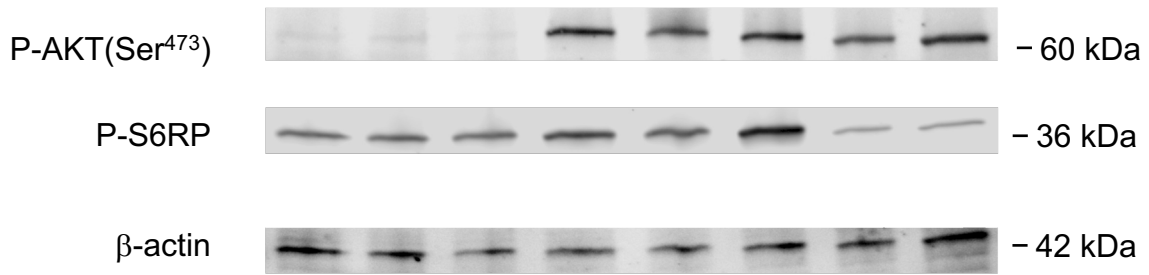

### Muscle

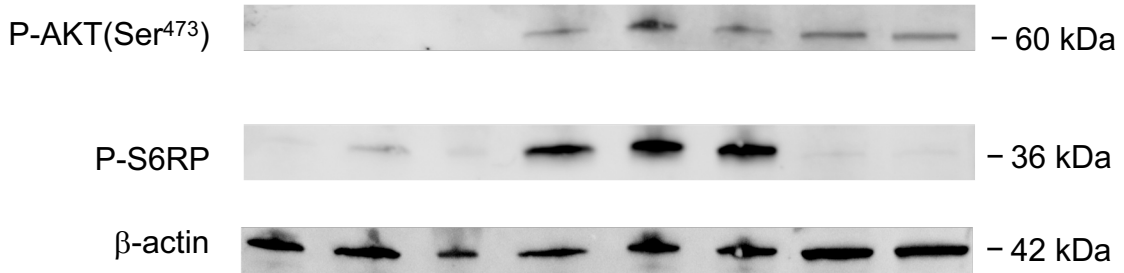

### Kidney

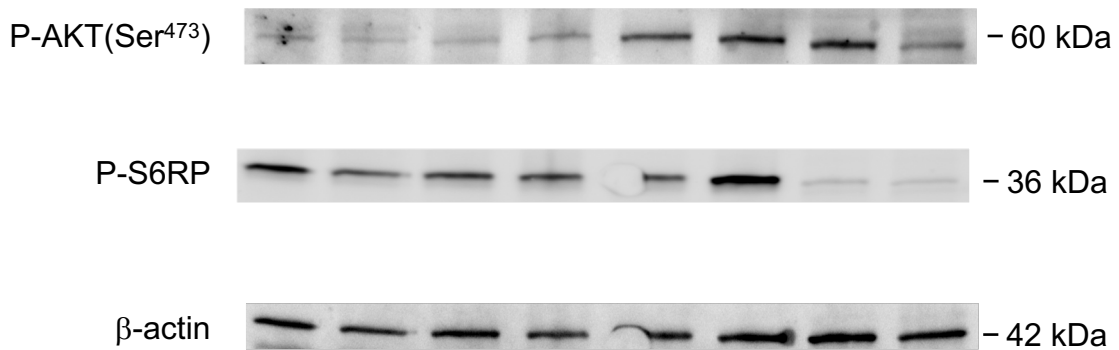

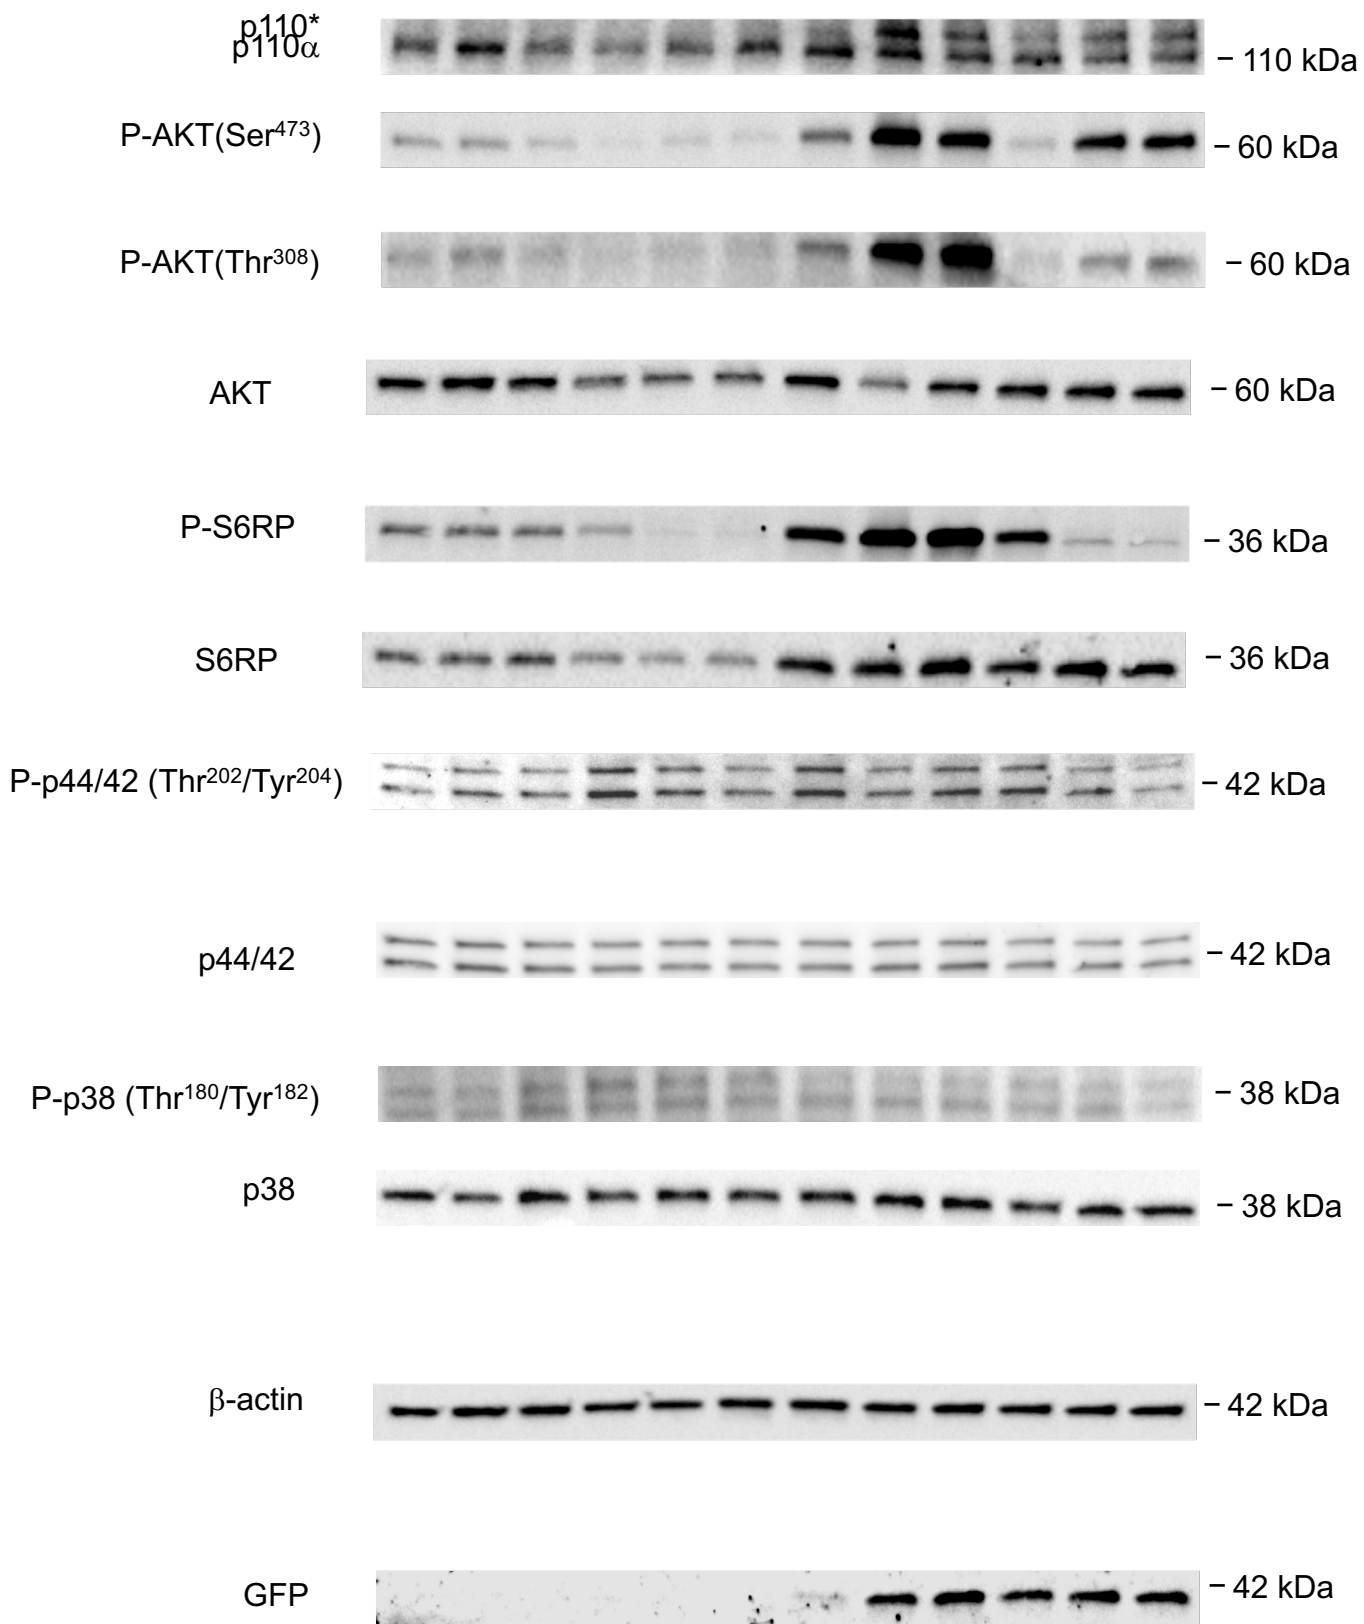

Supplementary Fig.2
